# Supplementary material for: Urinary Metabolites Reveal Hyperinsulinemia and Insulin Resistance in Polycystic Ovarian Syndrome (PCOS)
Source: MDPI journal article supplement (doi:10.3390/metabo11070437), 2021-07-02
Supplement: s1 [file s1]

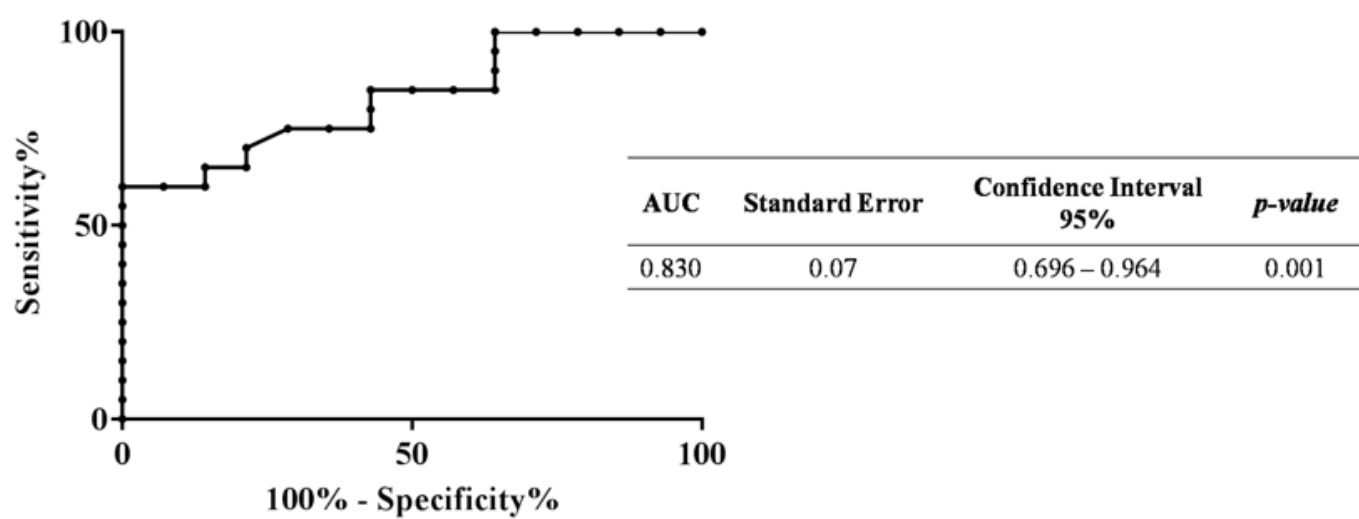

**Figure S1.** Representative ROC curve built by combining all significantly altered metabolites between the two groups.
